# Supplementary material for: Consequences of COVID-19 Confinement on Anxiety, Sleep and Executive Functions of Children and Adolescents in Spain
Source: PubMed Central journal article supplement (PMC7921483; doi:10.3389/fpsyg.2021.565516), 2021-02-16
Supplement: Image_1.pdf [file Image_1.pdf]

## *Supplementary Material*

### 1 Supplementary Figures and Tables

#### 1.2. Supplementary Figures

Figure 1. Percentage of total sample (N=1028) with low, medium and high scores in each of the administered tests.

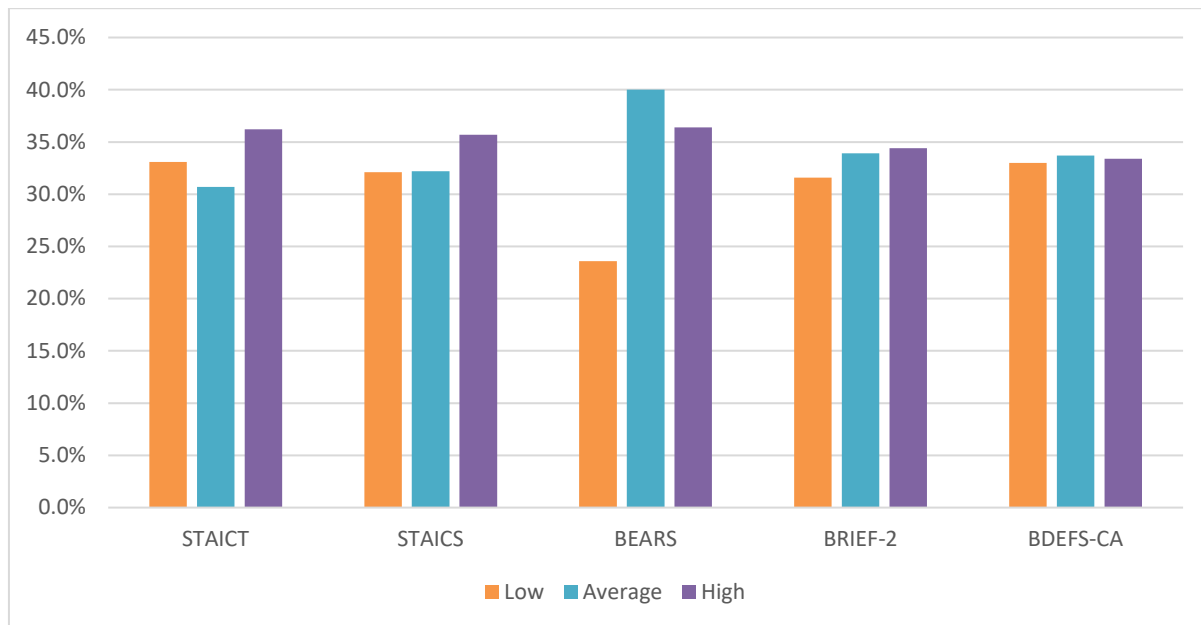

*STAICS*, State Anxiety Inventory for Children.

*STAICT*, Trait Anxiety Inventory for Children.

*BEARS*, Screening for sleep disorders in childhood.

*BRIEF-2*, Behavioral Evaluation of Executive Function.

*BDEFS-CA*, Barkley Deficits in Executive Functioning Scale. Children and Adolescents.
