# Supplementary material for: Consequences of COVID-19 Confinement on Anxiety, Sleep and Executive Functions of Children and Adolescents in Spain
Source: PubMed Central journal article supplement (PMC7921483; doi:10.3389/fpsyg.2021.565516), 2021-02-16
Supplement: Image_2.pdf [file Image_2.pdf]

## *Supplementary Material*

### 1 Supplementary Figures and Tables

#### 1.2. Supplementary Figures

Figure 2. Path Analysis. Model of the influence of the State/Trait Anxiety and Sleep in the executive functioning in children and adolescents during confinement by COVID19.

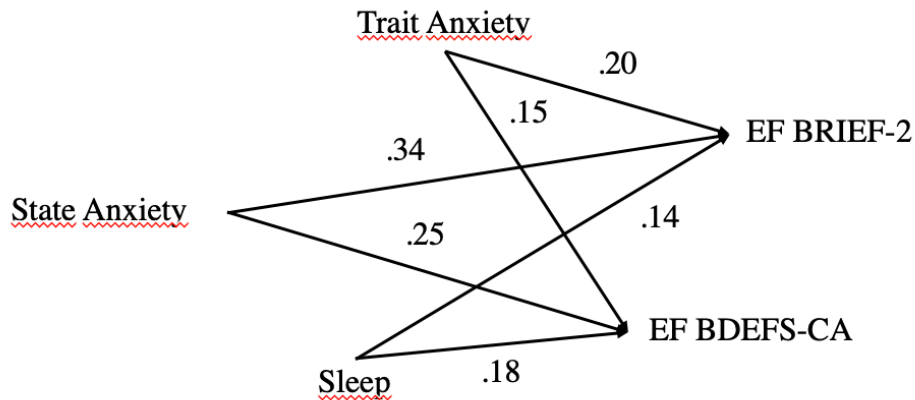

*EF BRIEF-2, executive functioning measured with BRIEF-2. Behavioral Evaluation of Executive Function.*

*EF BDEFS-CA, executive functioning measured with BDEFS-CA. Barkley Deficits in Executive Functioning Scale. Children and Adolescents.*
