# Supplementary material for: Consequences of COVID-19 Confinement on Anxiety, Sleep and Executive Functions of Children and Adolescents in Spain
Source: PubMed Central journal article supplement (PMC7921483; doi:10.3389/fpsyg.2021.565516), 2021-02-16
Supplement: Table_1.pdf [file Table_1.pdf]

## *Supplementary Material*

### 1 Supplementary Figures and Tables

#### 1.1 Supplementary Tables

Table 1. Means for state/trait anxiety, sleep, and executive functioning according to non-confinement samples.

|                        | <b>Total Mean (6-18 years) –<br/>Non-confinement samples</b> |               | <b>Total Mean –<br/>Confinement Sample</b> |               |
|------------------------|--------------------------------------------------------------|---------------|--------------------------------------------|---------------|
|                        | State Anxiety                                                | Trait Anxiety | State Anxiety                              | Trait Anxiety |
| <b>Anxiety (STAIC)</b> | 31.2                                                         | 35.7          | 34.73                                      | 33.67         |
| <b>Sleep (BEARS)</b>   | 7.4                                                          |               | 13.18                                      |               |
| <b>EF (BRIEF-2)</b>    | 45.87                                                        |               | 42.21                                      |               |
| <b>EF (BDEFS-CA)</b>   | 33.2                                                         |               | 70.69                                      |               |

*STAIC. State-Trait Anxiety Inventory for Children.*

*BEARS. Screening for sleep disorders in childhood.*

*BRIEF-2. Behavioral Evaluation of Executive Function.*

*BDEFS-CA. Barkley Deficits in Executive Functioning Scale. Children and Adolescents.*
