# Supplementary material for: Consequences of COVID-19 Confinement on Anxiety, Sleep and Executive Functions of Children and Adolescents in Spain
Source: PubMed Central journal article supplement (PMC7921483; doi:10.3389/fpsyg.2021.565516), 2021-02-16
Supplement: Table_2.pdf [file Table_2.pdf]

Table 2. Student T-test for differences in state anxiety, sleep and executive functions by sex.

| <b>Instrument</b> | <b>Sex</b> | <b>N</b> | <b>Mean (SD)</b> | <b>t</b> | <b>p</b> | <b><math>\delta</math></b> |
|-------------------|------------|----------|------------------|----------|----------|----------------------------|
| <b>STAIC</b>      | Men        | 548      | 34.40 (8.47)     | -1.32    | .19      | -                          |
|                   | Women      | 478      | 35.12 (9.04)     |          |          |                            |
| <b>BEARS</b>      | Men        | 548      | 13.04 (3.59)     | -1.38    | .17      | -                          |
|                   | Women      | 478      | 13.35 (3.67)     |          |          |                            |
| <b>BRIEF-2</b>    | Men        | 548      | 44.70 (16.50)    | 5.18     | .001     | <b>.32</b>                 |
|                   | Women      | 478      | 39.40 (16.20)    |          |          |                            |
| <b>BDEFS-CA</b>   | Men        | 548      | 76.33 (28.66)    | 7.05     | .001     | <b>.44</b>                 |
|                   | Women      | 478      | 64.25 (26.21)    |          |          |                            |

*STAIC. State-Trait Anxiety Inventory for Children.*

*BEARS. Screening for sleep disorders in childhood.*

*BRIEF-2. Behavioral Evaluation of Executive Function.*

*BDEFS-CA. Barkley Deficits in Executive Functioning Scale. Children and Adolescents.*
