# Supplementary material for: Consequences of COVID-19 Confinement on Anxiety, Sleep and Executive Functions of Children and Adolescents in Spain
Source: PubMed Central journal article supplement (PMC7921483; doi:10.3389/fpsyg.2021.565516), 2021-02-16
Supplement: Table_3.pdf [file Table_3.pdf]

## *Supplementary Material*

### 1 Supplementary Figures and Tables

#### 1.1 Supplementary Tables

Table 3. Mann-Whitney U test for differences in executive functions by sex.

| <b>Instrument</b> | <b>Sex</b> | <b>n</b> | <b>Range</b> | <b>U</b> | <b>p</b> |
|-------------------|------------|----------|--------------|----------|----------|
| <b>STAIC</b>      | Men        | 548      | 512.04       | -.17     | .87      |
|                   | Women      | 478      | 515.17       |          |          |

*STAIC. State-Trait Anxiety Inventory for Children.*
