# Supplementary material for: Consequences of COVID-19 Confinement on Anxiety, Sleep and Executive Functions of Children and Adolescents in Spain
Source: PubMed Central journal article supplement (PMC7921483; doi:10.3389/fpsyg.2021.565516), 2021-02-16
Supplement: Table_4.pdf [file Table_4.pdf]

Table 4. One way ANOVA for differences in state anxiety, sleep and executive functions according to age group.

| <b>Instrument</b> | <b>Age Group</b> | <b>n</b> | <b>Mean (SD)</b> | <b>F</b> | <b>p</b> | <b><math>\omega^2</math></b> |
|-------------------|------------------|----------|------------------|----------|----------|------------------------------|
| <b>STAIC</b>      | 6-8              | 353      | 33.29 (8.13)     | 7.41     | .001     | <b>.01</b>                   |
|                   | 9-12             | 390      | 35.75 (9.07)     |          |          |                              |
|                   | 13-18            | 285      | 35.35 (8.85)     |          |          |                              |
| <b>BEARS</b>      | 6-8              | 353      | 12.79 (3.32)     | 3.83     | .02      | <b>.01</b>                   |
|                   | 9-12             | 390      | 13.24 (3.79)     |          |          |                              |
|                   | 13-18            | 285      | 13.58 (3.74)     |          |          |                              |
| <b>BRIEF-2</b>    | 6-8              | 353      | 42.93 (15.43)    | .81      | .45      | -                            |
|                   | 9-12             | 390      | 42.25 (17.61)    |          |          |                              |
|                   | 13-18            | 285      | 41.25 (16.45)    |          |          |                              |
| <b>BDEFS-CA</b>   | 6-8              | 353      | 69.98 (24.37)    | .38      | .68      | -                            |
|                   | 9-12             | 390      | 71.66 (30.50)    |          |          |                              |
|                   | 13-18            | 285      | 70.25 (29.26)    |          |          |                              |

*STAIC. State-Trait Anxiety Inventory for Children.*

*BEARS. Screening for sleep disorders in childhood.*

*BRIEF-2. Behavioral Evaluation of Executive Function.*

*BDEFS-CA. Barkley Deficits in Executive Functioning Scale. Children and Adolescents.*
