# Supplementary material for: Consequences of COVID-19 Confinement on Anxiety, Sleep and Executive Functions of Children and Adolescents in Spain
Source: PubMed Central journal article supplement (PMC7921483; doi:10.3389/fpsyg.2021.565516), 2021-02-16
Supplement: Table_5.pdf [file Table_5.pdf]

## *Supplementary Material*

### **1 Supplementary Figures and Tables**

#### **1.1 Supplementary Tables**

Table 5. Kruskal Wallis H test for trait anxiety by age group.

| <b>Instrument</b> | <b>Groups</b> | <b>n</b> | <b>Range</b> | <b>H</b> | <b>p</b> |
|-------------------|---------------|----------|--------------|----------|----------|
| <b>STAIC</b>      | 6-8           | 353      | 528.53       | 2.58     | .28      |
|                   | 9-12          | 390      | 514.52       |          |          |
|                   | 13-18         | 285      | 490.70       |          |          |

*STAIC. State-Trait Anxiety Inventory for Children.*
