# Supplementary material for: Consequences of COVID-19 Confinement on Anxiety, Sleep and Executive Functions of Children and Adolescents in Spain
Source: PubMed Central journal article supplement (PMC7921483; doi:10.3389/fpsyg.2021.565516), 2021-02-16
Supplement: Table_7.pdf [file Table_7.pdf]

Table 7. Differences between males and females with low, average and high state anxiety (SA) in relation to executive functions (BDEFS-CA).

| <b>Groups</b>                | <b>n</b> | <b>Mean</b> | <b>F</b> | <b>Df</b> | <b>p</b> | <b><math>\omega^2</math></b> |
|------------------------------|----------|-------------|----------|-----------|----------|------------------------------|
| <b>Men with low SA</b>       | 180      | 62.49       |          |           |          |                              |
| <b>Men with average SA</b>   | 187      | 76.19       |          |           |          |                              |
| <b>Men with high SA</b>      | 181      | 90.23       | 47.71    | 5         | .001     | .19                          |
| <b>Women with low SA</b>     | 149      | 51.13       |          |           |          |                              |
| <b>Women with average SA</b> | 144      | 63.82       |          |           |          |                              |
| <b>Women with high SA</b>    | 185      | 75.15       |          |           |          |                              |

*SA, state anxiety.*
