# Supplementary material for: Consequences of COVID-19 Confinement on Anxiety, Sleep and Executive Functions of Children and Adolescents in Spain
Source: PubMed Central journal article supplement (PMC7921483; doi:10.3389/fpsyg.2021.565516), 2021-02-16
Supplement: Table_8.pdf [file Table_8.pdf]

## *Supplementary Material*

### **1 Supplementary Figures and Tables**

#### **1.1 Supplementary Tables**

Table 8. Correlations between STAI Cs/Ct scores and the rest of the batteries.

|               | <b>BEARS</b> | <b>BRIEF-2</b> | <b>BDEFS-CA</b> |
|---------------|--------------|----------------|-----------------|
| <b>STAICS</b> | .420         | .534           | .421            |
| <b>STAICT</b> | .024         | .384           | .387            |

*STAIC. State-Trait Anxiety Inventory for Children.*

*STAICS, State Anxiety Inventory for Children.*

*STAICT, Trait Anxiety Inventory for Children.*

*BEARS. Screening for sleep disorders in childhood.*

*BRIEF-2. Behavioral Evaluation of Executive Function.*

*BDEFS-CA. Barkley Deficits in Executive Functioning Scale. Children and Adolescents.*
